CORRECTION

# Correction: Microseminoprotein-Beta Expression in Different Stages of Prostate Cancer

The *PLOS ONE* Staff

The twelfth author, Tapio Visakorpi, should also be listed as a corresponding author with the following email address: [tapio.visakorpi@uta.fi](mailto:tapio.visakorpi@uta.fi).

The affiliation for the ninth author is incomplete. Johanna Schleutker is currently affiliated with Medical Biochemistry and Genetics, Institute of Biomedicine, University of Turku, Turku, Finland.

The publisher apologizes for the error.

## Reference

1. Sjöblom L, Saramäki O, Annala M, Leinonen K, Nättinen J, Tolonen T, et al. (2016) Microseminoprotein-Beta Expression in Different Stages of Prostate Cancer. *PLoS ONE* 11(3): e0150241. doi: [10.1371/journal.pone.0150241](https://doi.org/10.1371/journal.pone.0150241) PMID: [26939004](https://pubmed.ncbi.nlm.nih.gov/26939004/)

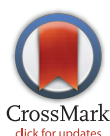

## OPEN ACCESS

**Citation:** The *PLOS ONE* Staff (2016) Correction: Microseminoprotein-Beta Expression in Different Stages of Prostate Cancer. *PLoS ONE* 11(4): e0153732. doi:[10.1371/journal.pone.0153732](https://doi.org/10.1371/journal.pone.0153732)

**Published:** April 11, 2016

**Copyright:** © 2016 The PLOS ONE Staff. This is an open access article distributed under the terms of the [Creative Commons Attribution License](https://creativecommons.org/licenses/by/4.0/), which permits unrestricted use, distribution, and reproduction in any medium, provided the original author and source are credited.
